# Supplementary material for: Hebbian plasticity induced by temporally coincident BCI enhances post-stroke motor recovery
Source: PubMed Central journal article supplement (PMC11319604; doi:10.1038/s41598-024-69037-8), 2024-08-12
Supplement: 41598_2024_69037_MOESM1_ESM.pdf [file 41598_2024_69037_MOESM1_ESM.pdf]

## Hebbian plasticity induced by temporally coincident BCI enhances post-stroke motor recovery

Johanna Krueger<sup>1</sup>, Richard Krauth<sup>1</sup>, Christoph Reichert<sup>2</sup>, Serafeim Perdakis<sup>3</sup>,  
Susanne Vogt<sup>1,4,5</sup>, Tessa Huchtemann<sup>1,4,6</sup>, Stefan Dürschmid<sup>2,7</sup>, Almut Sickert<sup>8</sup>,  
Juliane Lamprecht<sup>8,9</sup>, Almir Huremovic<sup>8,10</sup>, Michael Görtler<sup>4</sup>, Slawomir J. Nasuto<sup>11</sup>,  
I-Chin Tsai<sup>1</sup>, Robert T. Knight<sup>12,13</sup>, Hermann Hinrichs<sup>2,4,7</sup>, Hans-Jochen Heinze<sup>2,14</sup>, Sabine Lindquist<sup>15</sup>,  
Michael Sailer<sup>8</sup>, Jose del R. Millán<sup>16-19</sup>, Catherine M. Sweeney-Reed<sup>1-7\*</sup>

\*Corresponding author: Catherine M. Sweeney-Reed, Neurocybernetics and Rehabilitation, Dept. of Neurology, Otto von Guericke University, Magdeburg, Leipziger Str. 44, 39120 Magdeburg, Germany. catherine.sweeney-reed@med.ovgu.de

### Supplementary Figure 1

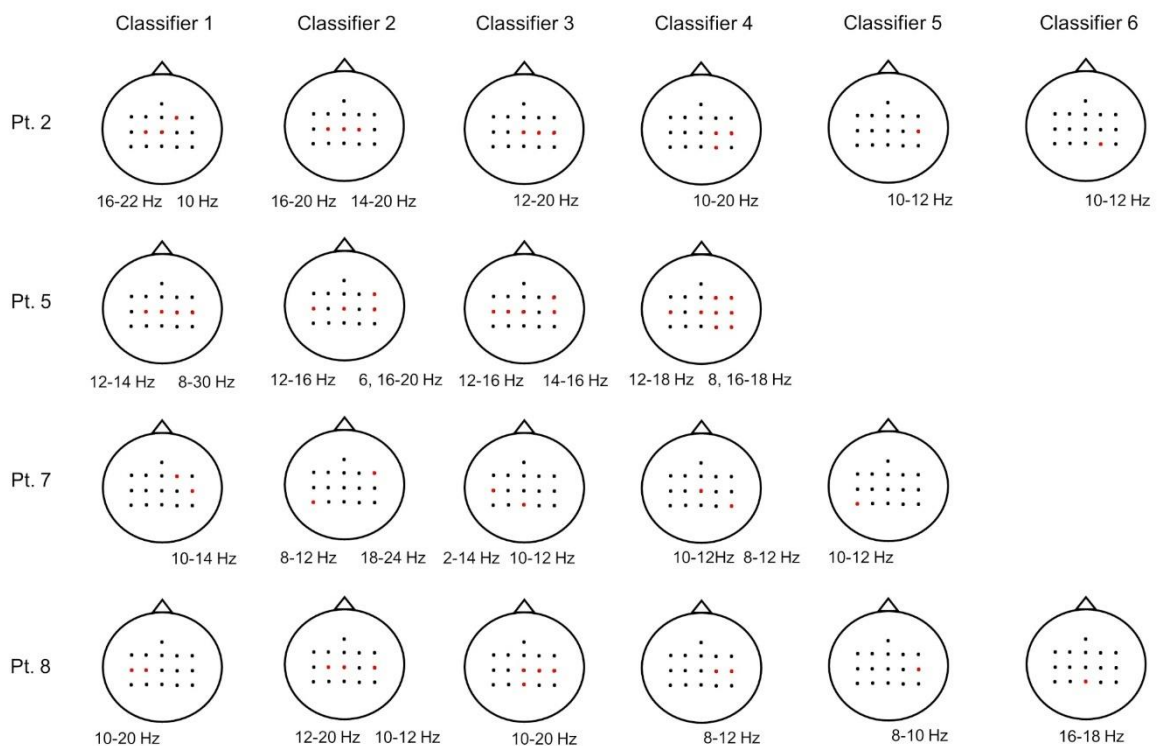

**Supplementary Figure 1. Classifier features.** Features selected for classifiers for patients in the BCI-FES group over the course of the therapy program. Note that classifiers were not trained to determine the timing of functional electrical stimulation in the Random-FES group. Selected electrodes are highlighted in red, and the frequencies chosen are given below the relevant electrode.
